# Supplementary material for: The adult nasal mucosa is defined by distinct immune profiles that modulate in-vitro SARS-CoV-2 infection.
Source: Research Square preprint supplement (doi:10.21203/rs.3.rs-8397474/v1), 2026-01-29
Supplement: Supplementary file 1 [file 7c0d715152e7fad6b6728470.xlsx]

## Sheet: Figure1_HCW_Luminex_Data
Sample_ID	IFNL3	IFNA2	IL1A	IP10	MIG	RANTES	IFNY	IL10	IL13	IL17A	IL1B	IL6	IL8	MIP1B	TNFA	MUC5AC
K047	11.2153	0	4.65841	40.4215	81.2491	2.86622	0.338791	1.56799	0.334534	0	0	2.3491	257.733	7.26513	0.228397	9.0293
K051	11.2153	5.04132	1.90811	193.35	507.273	42.2236	1.42726	1.90293	0.0444848	0.258642	0	0.600447	272.639	10.5675	0.241176	5.45509
K053	0	4.97128	2.21167	1.15771	2.92626	0.4691	0	0.209215	0	0	0	0.0174029	28.756	4.07396	0.0265869	0.88552
K055	0	3.05024	51.6956	0.496202	3.25386	0.245786	0.0957644	0.277197	0.0222424	0.0240683	0.0698392	0.0174029	17.0952	5.41694	0.0469803	3.26865
K059	1.62552	1.13396	4.92618	1.82308	5.26872	0.428156	0	0.209215	0	0	0	0	44.7854	0.701703	0	4.92341
K060	0.555674	9.24655	27.9489	3.18664	4.00064	0.887944	0.0957644	0.277197	0	0.0240683	0.104809	1.32915	27.9074	5.30814	0.13843	0.841368
K063	0	3.8034	8.2696	1.78766	4.87576	0.244786	0.243026	0.172589	0.0600664	0.0240683	0.288919	0.016395	4.1634	5.12658	0.079921	0.27119
K068	0	6.26312	21.0937	244.973	457.547	46.677	1.03425	2.73488	0.0762669	0.32714	0.625528	2.08787	882.864	26.6972	1.06678	23.275
K071	6.673	0	8.13443	616.881	400.432	15.9178	0.0957644	0.704466	0.864183	0	0	0.117716	137.998	6.78734	0.151411	4.45832
K073	0	0.928869	31.9624	0	14.9863	4.80393	0.191529	1.05426	0	0.0240683	0.179804	0.0758518	74.9055	5.23868	0.151333	3.43859
K075	3283.76	131.46	34.0404	1793.67	438.265	18.6337	3.52864	6.44341	0.94688	0.818426	0	0.61257	21.8649	4.2744	0.404788	2.05766
K076	1.11135	0	26.6106	0	3.30463	0	0.0957644	0.345178	0	0.0240683	0.174248	0.298534	117.111	5.5582	0.190052	2.15659
K078	1.11135	0	5.19155	0	0.623408	0	0	0.209215	0	0	0.00144574	0.0318784	2.28181	4.03072	0	0.336285
K082	0	4.43738	27.0097	0	10.3753	0.337904	0.486053	0.879364	0	0.187638	1.96896	0.291988	179.426	6.96486	0.240889	3.73673
K094	1.11135	0.579508	1.46946	0	1.43885	0.182928	0.899415	1.05426	0	0.141931	0	0.117544	158.845	2.99118	0.17715	0.877551
K097	1.11135	0.205089	4.66314	0	2.07003	0	0	0.209215	0	0	0	0	35.3291	0	0	0.615243
K100	2141.67	74.7185	20.2228	315.745	41.4743	5.99956	1.67374	4.04011	0.220119	0.458702	0	0.290695	23.7839	0	0.202361	2.07254
K107	0	0	20.7	0	0.525568	0	0.191529	0.134671	0	0	0	0	24.4257	4.66333	0.0265869	1.25236
K114	0.555674	0	27.9714	22.1229	30.7337	0	0.0957644	0.277197	0	0	2.16511	0.0758518	42.7391	0	0.0265869	2.7034
K116	13.0967	1.85774	8.27067	15.405	12.0985	1.13241	0.760152	2.32385	0	0	0.172504	0.117001	90.267	4.65378	0.125054	3.26464
K118	0	0	0.428826	0	0	0	0	0.104608	0	0	0	0	7.30554	4.06831	0	0.490194
K119	0	1.50838	27.8627	1801.34	2162.65	8.87704	1.03425	1.22622	0	0.189395	0.983716	9.13878	1654.33	17.4566	5.00708	29.9978
K123	3.25104	2.1939	20.8505	296.142	526.47	50.6198	0.899415	5.32999	0.356988	0.189395	0	1.97357	360.544	8.08622	0.609389	8.4566
K127	17.7689	2.1939	4.65935	145.058	29.5916	4.08812	0.338791	2.2409	1.27127	0	0	0.0889574	150.869	3.49496	0.072115	3.91475
K131	0.555674	0	7.82288	4.64424	4.22147	0.546908	0	0.251937	0	0	0	0.0758518	101.728	0	0.0229441	2.64205
K134	3.25104	1.79733	3.15646	5.86555	11.8673	2.13861	1.03119	1.56799	0.187312	0.0240683	0.345139	0.03279	33.6023	2.13088	0.13843	1.90439
K139	1.11135	0.410177	6.10153	0	1.43885	1.34518	0.243026	0.456841	0	0	0	0.016395	23.7453	2.21844	0.0208625	0.928711
K146	0	0	23.7988	0	11.2905	0.184238	0	0.345178	0	0.0240683	0.174514	0.0174029	34.0844	4.71306	0.0595141	1.22164
K158	3.25104	3.50494	20.7825	99.3793	145.038	47.1662	1.93787	3.06817	1.11132	0.189395	0.237471	1.52853	284.292	17.8428	0.70189	7.47058
K161	119.166	5.45435	9.7174	49.9981	80.9643	1.97315	1.29548	2.40768	0	0.141931	0	0.278785	102.294	4.65378	0.170739	6.12996
K162	0	0	16.7551	39.0493	94.4455	0	0	0.209215	0	0	0.0535608	0.0828148	31.5914	4.38851	0.163871	4.34609
K168	0	0	38.5296	69.3687	120.272	1.57994	0	0.209215	0	0	0	0.575185	169.587	3.85409	0.0324588	5.09744
K173	0	0	1.47445	62.693	39.7061	0.0586471	0	0.277197	0	0	0	0.0318784	49.703	3.32263	0.00574765	2.76144
K175	0	0	4.99102	0	0.926132	0	0.0957644	0.277197	0	0	0	0.016395	16.2589	2.89881	0.00939043	0.544735
K180	0.555674	0.205089	18.3827	0	14.8683	0	0	0.209215	0	0	0.00583859	0.00100792	20.8914	4.26814	0.0461368	3.3438
K183	0.681694	0	16.3128	0	4.76799	0	0.0957644	0.277197	0	0.0240683	0.0875493	0.0174029	24.5061	4.14005	0.086093	1.77451
K185	5.70676	0	3.61167	31.5982	28.8266	1.422	0	0.345178	0	0	0	0.0308705	48.109	0	0.0151381	5.36935
K189	0	1.3795	11.7582	10.6366	18.4496	0.28049	0	0.18197	0.000555782	0	0.477717	0.0202726	55.8747	1.91943	0.0127099	5.54489
K199	0	4.00026	58.303	142.72	461.596	79.2482	0	0.722479	0.0014489	0	0.0343515	0.682525	329.702	5.83435	0.213051	22.2306
K200	0	0.0058456	13.3111	0	14.9949	0.4604	0	0.0475396	0.00364992	0	0.157227	0.0124559	6.03364	1.031	0.00399132	2.56927
K203	0	0.896795	5.54236	39.5921	55.5137	1.04048	0	0.18197	0.0014489	0	0	0.0911857	36.07	0.00878618	0.00204412	4.43188
K205	0	4.2594	15.9536	31.9642	52.0514	7.61236	0	0.18197	0.000733794	0	0.0215546	0.0717325	68.0343	2.36919	0.0118798	2.43602
K206	0	0.165154	3.70278	0	8.16648	0.235347	0	0.0475396	0.000555782	0	0	0.0795014	22.9618	0.0281155	0.00262361	1.10494
K207	0	0.488553	10.5826	0	32.1741	4.9671	0	0.358403	0.000555782	0.020935	0	0.836523	212.902	2.64254	0.0197714	4.07133
K209	0	1.2806	13.3973	2.97255	21.0637	0.186192	0	0.0475396	0.00495782	0	0	0.00922828	1.98764	0.186263	0.00385525	0.762485
K216	0	2.17155	7.02724	17.9979	113.415	0.327241	0	0.271513	0.0011217	0	0	0.0795161	121.409	0	0.00385525	4.99767
K220	0	0.488553	12.411	12.2156	47.713	4.51987	0.0887053	5.71194	0.00394161	0.119486	0.163794	0.431843	194.632	3.0218	0.0277165	4.77483
K224	0	0.165154	3.92999	0	0.902042	0	0	0.0475396	0.0013316	0	0	0.0717325	35.9487	0.54473	0.00671089	0.889233
K226	0	2.00725	27.3381	7.82427	72.1583	12.4767	0.0887053	0.449532	0.00094369	0	0.0182438	0.0561388	258.969	4.63106	0.0363762	4.65236
K228	0	0.976449	12.4115	2.87167	19.3643	0.545961	0	0.18197	0.00294962	0	0.000447524	0.0717244	15.7481	2.19469	0.00631794	1.45255
K231	13.2852	10.0815	9.01269	83.9529	160.84	68.7126	9.58174	5.10514	0.272275	0.238773	0.792863	0.110593	33.5373	2.27605	0.168031	3.01772
K235	0	0.0825768	0.929353	0	1.70734	0	0	0	0.0013316	0	0	0	15.1594	0	0.00105941	0.993944
K240	0	2.48995	31.4442	19.2107	42.9415	0.666468	0	0	0.000314391	0	0	0	24.2049	0	0.00117419	1.81422
K248	0	0.165154	9.33387	42.5973	72.3792	1.19914	0	0.0950791	0.0013316	0	0	0.102848	65.7696	8.99464	0.00671089	2.84884
K253	0	0.0854996	41.7663	0	8.88033	0	0	0.0475396	0.00739623	0	1.9479	0.00461414	7.96505	1.02046	0.0045074	0.434266
K256	0	0.896795	15.1244	0	4.00865	0.543787	0	0.13443	0.00094369	0	0.023815	0	13.4581	0	0.00204412	0.821032
K263	0	2.92408	41.9439	44.0781	91.8633	0.4604	0	0.358403	0.00234202	0.290201	0.11184	0.149454	278.731	4.30959	0.087325	6.25742
K266	0	4.18039	2.9533	29.6386	27.7176	1.85139	0	0.0475396	0.000555782	0	0	0	51.5483	0	0.00204412	3.87046
K267	0	0.165154	3.93037	44.4994	44.9106	3.62395	0	0.0950791	0.00364992	0	0	0.0405305	57.8599	0	0.0217181	3.67437
K268	386.817	37.2755	19.0601	94.2882	82.9177	5.01453	0.177411	0.449532	0.0013316	0	0	0.0170701	13.6494	0	0.00385525	1.36627
K269	0	5.38736	16.7017	98.1788	155.744	1.00068	0	0.26886	0.000555782	0	0	0.0950766	62.0728	0.0825882	0.00671089	10.2886
K277	0	1.3795	14.1368	118.68	117.338	0.162737	0	0.0950791	0.00234202	0	0	0.149439	66.2354	5.11189	0.00593851	4.51087
K279	0	2.73445	1.21048	14.7667	49.7921	0.957303	0.0887053	0.0475396	0.00511018	0	0.111456	0.0249119	24.5706	0.291694	0.00933476	1.33548
K280	0	0.488553	11.5562	28.7082	59.9139	1.43247	0	0.224956	0.0013316	0	0.026266	0.172719	209.313	2.56421	0.0231921	5.87202
K283	0	1.78775	70.7373	0	12.6662	0	0	0.0475396	0.00355721	0	0.0118699	0	4.5227	0.312781	0.0045708	3.05938
K299	0	0.97126	11.5579	9.23426	34.8107	3.78016	0	0.0950791	0.000314391	0	0	0.0561388	40.2443	0.00878618	0.00913175	2.89338
K301	0	3.63152	120.782	28.465	36.8135	15.3298	1.13153	1.09641	0.0111622	0.0104675	0.103352	0.0170701	82.3795	4.59628	0.0295325	5.40186
K304	0	0.0058456	35.5277	12.1361	44.6934	4.45487	0	0.0950791	3.65e-05	0	0	0.0249119	39.6349	0	0.00204412	1.98647
K306	0	1.7633	12.0028	29.1257	39.8891	3.5187	0	0.0950791	0.0014489	0	0	0	25.7979	0	0.00427134	5.08585
K307	0	0.488553	41.55	3.53994	17.9916	0	0	0.0475396	0.00294962	0	0.0180751	0.00528413	13.984	0.37604	0.00385525	0.925348
K311	0	0.0854996	145.968	14.918	38.5743	2.87923	0	0.0950791	7.3e-05	0	0.0818224	0.126154	112.121	1.29997	0.012752	5.6143
K312	0	2.17155	20.5627	39.1208	247.693	2.5542	0	0.358403	0.000314391	0.0104675	0.880503	0.451171	231.739	9.80453	0.0634182	8.75598
K313	0	6.72673	119.033	35.6512	130.34	1.27788	0.177411	1.09503	0.0013316	0.0859768	0.604695	0.466612	2217.88	8.19905	0.197555	10.9266
K324	0	2.54028	14.5471	92.2364	80.6216	0.79739	0	0	0	0	0	0	8.14762	0	0.00030425	5.89027
K326	12.4701	1.43827	16.079	177.193	444.457	23.4736	0.0403314	2.04861	0	0	0	0.994408	145.942	4.17556	0.0326148	8.0962
K329	0	0	33.7657	3.09399	8.62525	0	0.0403314	0.318343	0	0.0625073	0.111679	0.00118171	68.2858	4.28182	0.0104531	1.28038
K330	114.21	9.1474	24.4115	19.4946	53.5885	1.604	0.0403314	0.754384	0	0	0	0.483525	46.7814	0	0.00593154	12.8752
K335	0	0	95.0392	2.51765	23.5412	0.128004	0	0.159171	0	0	0	0.0392232	64.0545	0.603371	0.0555709	21.8179
K339	0	0	3.76376	0.598857	21.747	0.303413	0.0403314	0.318343	0	0.00167947	0.00359498	0.282972	47.2976	5.12532	0.00401403	2.66546
K340	0	0	0.355085	23.7265	31.1302	2.2171	0.0201657	0.318343	0	0	0	0	57.2044	0	0	3.61642
K341	0	0	25.7448	46.0962	78.5896	4.66502	0.0201657	0.159171	0	0	0	0.11025	34.4411	2.99123	0.0129586	8.96424
K342	400.947	42.9275	17.2008	36.5986	78.9969	5.26548	1.12119	5.88925	0.0562469	0.86798	0	0.282361	9.36119	0	0.0455011	3.02849
K343	0	0	23.5501	16.9516	80.7125	1.45297	0.0403314	0.318343	0	0.121656	0	0.324185	141.099	3.94745	0.0237311	7.39667
K358	0	0	9.05825	17.2089	92.9761	1.1841	0.327539	1.83361	0	0.18113	0.0796136	1.12209	252.241	6.71894	0.0421419	4.67951
K364	126.347	11.7511	38.9531	47.3691	95.4034	16.0785	0.254772	2.04861	0	0.121981	0.00585512	0.240405	136.736	0	0.0296057	21.0699
K375	86.1057	1.8779	6.96209	52.9392	104.938	9.47784	0.111671	0.970961	0	0.00167947	0	0.177093	150.404	0	0.00819232	5.67534
K377	228.684	43.1902	19.6151	138.844	362.173	128.289	3.59678	13.4966	1.4442	1.28756	0.930624	0.581431	120.566	5.81589	0.366437	1.48887
K379	0	0	16.4222	30.4043	130.812	0.671283	0.0403314	1.18754	0	0.00167947	0	0.11025	51.5365	0	0.00104826	3.52989
K390	356.538	29.0233	18.4354	89.8413	142.566	10.8725	0.904206	4.61319	0.0781933	0.539076	0	0.484166	45.0067	1.0712	0.0530062	4.31543
K401	0	0	64.4627	111.58	219.144	31.9889	0.32675	1.61832	0.000161369	0.18113	0.0509051	1.879	370.604	7.90166	0.319898	21.0617
K413	0	0	23.4622	156.187	482.087	22.7723	0.254772	1.18754	0.0323178	0.0328566	0.0953383	1.71451	206.73	8.19735	0.149695	5.34912
K418	140.239	14.9399	11.72	59.2421	65.2676	10.6614	0.47064	2.47827	0.00792155	0.538959	0	0.262226	57.3653	0	0.0267402	4.53773
K433	26.6745	0	63.5656	552.263	692.845	7.6104	0.18301	2.69245	0	0.0625073	0.411218	2.35484	521.778	10.9412	0.0884174	19.7857
K436	6.3342	0.480339	75.879	226.748	304.051	19.3065	0.111671	2.04861	0	0.18113	0.0970726	0.76216	154.541	5.51989	0.0772722	18.469
K449	0	0	23.7615	11.856	36.5334	0.850863	0.398878	0.970961	0.00335909	0.00335894	0.0875392	0.484166	45.8377	1.41344	0.0162641	5.78056
K451	33.6568	0.913754	0.213383	13.2111	26.3348	0.991215	0.32675	1.61832	0	0.0608278	0	0.0633412	27.8651	0	0.00819232	2.75804
K455	9.97106	0.0614755	9.24651	72.4305	66.0721	1.29905	0.0759192	0.970961	0	0.00335894	0	0.0874591	47.039	0	0.00819232	7.66812
K457	0	0	0.581296	27.7594	59.0209	3.6457	0.18301	0.754384	0	0.00167947	0	0.0392232	69.4475	0.603371	0.0051095	1.99908
K460	0	0	16.6057	60.0402	306.978	22.542	0.18301	1.18754	0	0.18113	0	1.93052	421.768	6.84001	0.116221	8.15503
K463	8.83322	4.53879	101.503	416.749	984.822	172.259	0.759228	43.0647	0.116692	3.3017	36.5161	3.51629	577.363	26.8148	1.19365	10.9039
K464	0	0	3.29023	40.2152	52.2812	0.951556	0.0201657	0.536364	0	0	0	0.000590857	14.3189	0	0.00104826	2.39621
K465	417.927	28.8206	26.8188	1109.82	2338.65	9.2013	0.471119	2.26279	0.000161369	0.181588	0	1.03117	146.916	2.14239	0.0591202	10.1826
K468	81.3782	6.6693	6.20694	73.7242	109.199	10.6224	1.77457	6.632	0.193211	1.49766	0	0.562297	16.5921	1.26332	0.0887102	2.9116
K470	13.4977	0.480339	23.1188	1.30772	8.42719	0.108724	1.34161	3.95858	0.112843	1.07926	0.315037	0.367991	5.71705	4.10869	0.107354	0.844211
K478	0	0.119764	57.4169	27.3506	78.1851	1.97501	0.0201657	0.754384	0	0.0608278	0.437487	1.47004	120.168	3.99017	0.0154641	3.08633
K490	0	0	4.79603	5.72449	21.1122	0.0172068	0.0201657	0.318343	0	0.00335894	0	0.0202025	6.65449	4.04757	0.00401403	0.489836
K495	0	0	2.67592	8.70572	2.49777	0	0.327539	1.61633	0.00335909	0.479469	0.00585512	0.444982	143.121	7.80561	0.141379	10.3126
K496	236.977	66.8154	22.6273	172.745	311.326	10.8247	1.9203	7.58444	0.144264	1.31761	0	0.560953	8.92583	1.2054	0.0927132	4.3329
K497	63.7173	23.8023	20.0893	117.89	301.362	51.0066	0.976303	2.47787	0.0757993	0.30021	0	0.262226	85.3415	4.36409	0.0421419	14.2989
K524	0	0	20.6985	0.677535	4.07672	0.0233008	1.9264	5.43223	0.185036	1.32141	0.113602	0.516949	12.6553	4.78547	0.0976317	0.923119

## Sheet: Figure2_GWOH_Luminex_Data
Sample_ID	IFNY	IL10	IL17A	IL1B	IL6	IL8	MIP1B	TNFA	IFNA2	IL1A	IL13	IP10	MIG	RANTES	IFNL3	MUC5AC
LAIV_029_V1	51.55	868.09	3.25	1.25	83.51	2348.18	138.47	10.87	21.7	21.2	14.8	13615.7	14678.3	133.8	38.4	514.565
LAIV_030_V1	2.01	8.45	0	0.63	4.25	1592.67	24.96	2.03	7	70.1	8.5	620.9	1390.2	144.4	0	504.695
LAIV_031_V1	1.23	2.59	0	0.82	1.26	1621.05	9.02	1.16	3.6	135.4	4.7	158.7	349.9	5.6	0	851.414
LAIV_032_V1	1.54	4.43	2.01	4.08	4.96	1170.69	40.27	7.95	6.7	370.6	8.2	369.2	1594.3	7.3	0	947.718
LAIV_033_V1	1.54	4.44	0	0.47	1.64	2075.32	5.48	1.41	5.3	97.8	7.3	179.1	610.7	37.9	0	461.803
LAIV_034_V1	2.55	5.2	1.29	0.23	2	657.65	33.17	2.11	11.4	17	17.7	1142.5	3042	28.3	13.22	880.773
LAIV_035_V1	1.86	11.6	0.76	0.66	1.57	1177.51	6.86	1.38	7.8	21.3	6.3	350.4	1679.8	43.4	0	442.122
LAIV_036_V1	2.32	3.66	0	0.24	0.78	488.91	4.18	0.88	7.9	40.2	18	242.9	614.7	5.5	26.29	349.954
LAIV_037_V1	2.32	7.7	1.29	2.47	6.62	1788.09	10.89	2.91	6.7	211.3	9.5	286.2	720.6	76.2	0	653.116
LAIV_038_V1	2.32	2.31	0	0.86	1.87	405.04	5.69	1.05	0	23.6	0	106.9	449.7	1.3	0	83.2784
LAIV_039_V1	0.91	1.48	1.02	1.98	0	273.89	4.64	1.13	4.3	114.1	2.4	45.1	108.8	0.7	0	46.9193
LAIV_040_V1	2.62	5.96	1.66	0.93	2.51	3623.59	18.12	2.93	10.8	68.9	7.9	262.3	591	131	0	472.284
LAIV_041_V1	2.92	6.84	2.31	0.49	12.9	1036.46	26.36	1.9	6.7	35.3	8.8	465.5	921.1	94.9	0	200.941
LAIV_060_V1	3.24	4.79	0	0.48	2.63	408.12	19.83	1.42	16.84	134.34	26.12	1036.53	4359.32	275.6	0	449.13
LAIV_061_V1	2.27	4.51	0	0.69	2.5	1073.95	10.54	1.37	6.71	178.91	12.57	1410	2912.24	87.07	0	1790.44
LAIV_062_V1	0.78	4.52	0	1.36	2.48	1068.06	27.7	4.24	4.74	141.53	5.1	1796.01	5562.66	5.75	0	95.0469
LAIV_063_V1	1.92	13.67	0	4.6	228.49	4188.6	38.47	5.2	13.98	458.16	18.21	120.22	702.82	144.8	0	668.994
LAIV_065_V1	0	0	0	1.83	0.94	408.4	4.05	1.04	4.09	522.31	0	14.91	115.27	1.28	0	885.051
LAIV_066_V1	2.48	4.52	0	0.74	0	407.03	3.94	0.57	24.63	106.27	20.72	45.98	153.42	62.95	0	321.154
LAIV_067_V1	2.27	4.25	0	0.06	0.35	77.57	3.09	0.44	11.02	18.03	20.22	824.84	753.62	14.19	0	382.319
LAIV_068_V1	1.51	2.6	0	1.78	23.65	628.47	66.85	6.18	14.56	319.43	25.69	3424.2	10545.9	156.15	0	3005.95
LAIV_069_V1	2.74	30.8	4.33	14.45	66.89	2738.61	132.93	12.82	20.23	526.5	36.85	7937.39	10566.9	471.16	0	664.087
LAIV_070_V1	2.92	13.67	2.1	1.35	8.68	1229.79	25.02	4.52	10.99	68.81	16.68	718.83	1131.42	149.09	0	431.724
LAIV_072_V1	3.15	5.86	0	18.21	68.47	1329.51	45.7	7.7	12.21	476.78	19.19	2464.46	5318.01	93.69	0	1935.35
LAIV_073_V1	7.41	33.88	6.69	4.94	206.77	1376.48	110.86	5.45	16.28	198.85	34.46	6121.84	5198.03	576.53	0	487.963
LAIV_074_V1	2.05	14.06	0	2.19	0.92	493.38	6.71	1.34	16.84	75.97	14.63	128.14	357.22	25.43	0	635.271
LAIV_075_V1	0	0	0	0.76	1.84	293.01	7.85	0	4.75	43.92	5.38	178.37	485.08	6.54	0	891.602
LAIV_076_V1	0.66	0	0	0	0	204.75	3.15	0	11.29	18.04	24.38	50.45	95.14	16.38	51.68	400.856
LAIV_077_V1	0	0	0	0.04	7.76	598.1	8.15	0.44	6.79	56.73	9	180.47	666.81	18.87	0	478.698
LAIV_078_V1	0.48	0	0	4.94	12.41	2999.4	12.23	3.65	16.26	409.24	38.56	479.75	2077.23	102.67	0	1523.57
LAIV_079_V1	1.15	5.58	0.97	0.09	8.59	306.41	8.46	0.98	16.12	15.2	35.39	407.11	435.47	61.26	85.14	274.292
LAIV_080_V1	0.8	7.7	1.15	0.48	53.4	1461.36	35.85	3.05	5.44	25.74	8.39	236.54	2117.23	179.59	0	463.783
LAIV_082_V1	0.8	3.48	0	0.17	0.63	120.09	4.14	0.41	15.32	16.13	27.7	135.99	226.41	23.34	69.79	243.336
LAIV_083_V1	0.59	7.13	0	1.03	2.16	2581.11	20.47	2.73	5.79	120.06	8.09	730.36	1240	172.14	0	454.626
LAIV_084_V1	0	4.03	0	1.22	1.1	1155.33	10.11	1.42	3.88	81.59	9.6	238.05	864.57	5.62	0	1852.75
LAIV_085_V1	0.73	0	0	0.06	0.63	328.28	7.56	0.84	4.75	38.38	6.28	1317.29	1764.35	6.22	0	505.724
LAIV_086_V1	0.66	3.76	0	0.21	0	1070.14	10.46	1.16	10.14	61.02	14.43	640.11	1310.38	222.64	0	480.142
LAIV_087_V1	0.38	3.76	0	0.07	1.81	366.92	4.55	0.35	5.44	16.13	7.79	308.07	1007.17	143.78	0	300.605
LAIV_088_V1	1.5	18.31	2.09	12.66	8.46	2894.54	11.84	8.51	7.48	146.26	14.73	636.72	1017.62	63.5	0	727.64
LAIV_089_V1	0.06	0	0	1.15	0.19	104.24	1.2	0.11	1.75	119.92	1.29	11.93	18.9	0.28	5.45	220.339
LAIV_090_V1	0.24	4.47	0	0.23	1.01	599.73	3.65	0.46	5.25	18.86	7.21	495.24	854.12	72.36	13.29	2187.12
LAIV_091_V1	0.16	3.21	1.09	2.78	9.75	2003.69	10.34	2.11	3.4	1308.02	4.69	457.37	1384.05	137.75	0	2075.72
LAIV_092_V1	0.32	8.67	0.39	0.34	3.01	1037.5	6.18	0.79	4.92	40.49	5.94	482.51	937.32	235.44	4.95	796.123
LAIV_094_V1	0.32	3.88	0.35	2.38	8.58	1483.47	12.42	1.74	12.58	86.73	5.24	4117.64	8348.44	353.08	6.92	1043.09
LAIV_096_V1	0.18	3.11	0	0.11	3.23	891.52	11.52	0.95	3.24	43.06	6.5	466.84	500.68	32.69	12.72	1243.86
LAIV_097_V1	0.14	2.73	0	0.84	0.7	1390.58	2.81	1.44	2.24	153.06	2.8	168.92	386.74	4.42	0	1362.43
LAIV_098_V1	0.14	1.24	0	2.28	1.17	3303.23	15.33	8.03	2.57	356.64	3.2	1062.15	2721.12	109.38	21.58	1723.25
LAIV_099_V1	0.24	2.54	0.53	0.19	0.21	56.78	1.5	0.34	7.28	12.62	7.63	264.06	260.94	37.17	30.44	806.185
LAIV_100_V1	0.06	1.79	0	0.14	0.16	212.19	1.89	0.14	1.58	44.55	1.14	40.77	270.43	2.12	0	391.538
LAIV_101_V1	0.18	1.97	0	0.71	0.33	419.09	3.52	0.21	2.41	107.36	3.6	99.39	221.99	84.35	7.78	295.74
LAIV_102_V1	0.1	2.73	0	0.04	0.3	69.85	0.66	0.03	1.58	29.41	0.78	104.03	111.1	5.77	0	114.305
LAIV_103_V1	0.61	15.06	0	1.05	1.74	359.6	5.63	0.64	5.15	82.38	3.03	29.81	84.77	8.04	0	207.392
LAIV_104_V1	0.54	3.93	0	0.49	0	450.59	8.13	0.34	0	65.8	0	25.2	39.01	1.2	1.88	246.362
LAIV_105_V1	1.18	29.22	4.01	10.63	120.66	1037.69	130.59	4.2	14.83	128.22	18.32	15803.3	13461	224.75	0	539.699
LAIV_106_V1	0.76	5.45	0	0	1.43	207.16	2.89	0.37	12.51	39.63	13.17	45.06	46.9	0.83	0	231.743
LAIV_108_V1	1.43	40.4	3.76	0.7	2.17	263.49	8.17	0.86	7.38	16.95	3.03	230.2	798.2	45.03	2.75	159.38
LAIV_109_V1	0.83	4.95	0	0.4	6.77	309.63	7.45	0.59	10.44	132.29	22.49	190.68	314.25	12.03	45.08	335.366
LAIV_110_V1	0.57	5.96	0	0.36	0.51	223.07	7.11	0.57	13.83	218.03	23.5	671.85	1519.89	121.48	7.2	312.134
LAIV_111_V1	1.83	12.24	1.87	0	0.99	128.6	4.39	0.7	18.48	39.59	25.13	155.69	154.66	3.68	64.71	278.517
LAIV_112_V1	1.49	14.78	2.36	1.11	3.91	2294.83	16.3	2.38	5.48	49.6	8.52	853.78	1173.75	37.38	0	370.013
LAIV_113_V1	0.97	15.06	2.12	1.24	17.16	1633.68	22.01	2.53	7.38	126.2	20.42	6927.97	6959.57	266.56	0	914.09
LAIV_114_V1	1.89	25.6	2.5	1.1	3.76	854.52	8.51	1.51	9.38	55.44	9.76	377.98	454.14	86.63	5.4	222.989
LAIV_115_V1	0.83	10.22	0	0	4.72	466.3	11.23	0.77	4.16	28.6	6.3	523.85	666.7	13.22	52.9	182.019
LAIV_116_V1	2.72	62.88	3.13	1.24	15.63	580.09	18.77	3.47	21.82	50.02	15.91	5306.63	2276.7	106.95	5.45	474.554
LAIV_117_V1	0	8.63	0.11	0.71	3.28	7865.72	13.93	3.37	27.29	91.67	16.74	507.36	2360.49	42.33	0	665.667
LAIV_118_V1	1.55	0	0	1.45	1.01	644.14	5.22	0.82	19.33	62.48	5.65	334.6	1108.19	147.81	0	132.294
LAIV_119_V1	0	22.1	0.72	0.83	11.02	2182.07	14.13	2.81	19.33	168.65	24.1	875.23	2039.5	29.81	0	447.694
LAIV_120_V1	4.56	50.57	1.75	8.67	163.37	2703.56	106.72	9.91	34.49	301.98	42.21	7747.02	3909.33	474.38	0	245.128
LAIV_121_V1	3.55	13.42	0	1.94	12.37	503	33.05	10.34	28.66	265.59	32.78	3113.23	8937.53	24.94	53	316.239
LAIV_014_V1	0	11.74	0	3.74	5.13	7824.26	47.31	8.05	5.34	819.96	39.13	276.17	1635.93	44.57	0	477.625
LAIV_046_V1	0	0	0	0	0	115.25	3.73	0	22.62	144.04	38.24	369.36	632.43	15.01	28.4	237.895
LAIV_048_V1	0	0	0	0.44	0	375.66	13.34	1.05	17.63	318.06	13.35	898.06	1900.37	39.62	0	382.734
LAIV_050_V1	0	0	0	0.37	1.48	449.41	3.19	0	12.01	118.13	17.81	627.41	2595.77	5.08	0	131.779
LAIV_051_V1	0	18.48	1.08	1.31	14.86	3313.78	26.23	4.46	45.06	206.74	30.9	1223.03	3504.89	243.54	0	407.84
LAIV_056_V1	0	21.39	0	0.86	1.19	396.2	5.29	0	31.67	41.96	15.64	171.13	415.52	13.13	0	66.7756
LAIV_064_V1	7.06	0	0	0.24	1.91	187.81	6.39	0.88	27.29	53.77	19.98	5105.24	6860.31	26.29	0	122.217
LAIV_071_V1	1.71	0	0	0.28	2.06	708.01	10.33	1.05	34.49	170.43	29	1504.11	4307.46	480.02	0	100.236
LAIV_081_V1	0	0	0	9.95	2.42	1513.57	8.4	4.07	10.01	678.76	27.07	261.93	502.82	13.35	0	296.181
LAIV_107_V1	1.38	0	0	6.49	3.21	5754.79	13.38	2.91	22.62	543.06	29.96	1361.08	3873.74	57.68	0	288.416

## Sheet: SARS-CoV-2_Data
	Delta CT
Donor ID	Control				High-chemokine				High-Interferons
#1	5.3571	7.40431	4.79557	6.6787	7.87986	8.4059	8.71014	8.30995	5.35592	3.39021	1.25522	1.02622
#2	7.54807	6.36364	8.07818		8.18301	8.01999			2.37324	2.76801	6.11343
#3	0.737165	3.64036	6.53817		7.27995	3.20544	4.95455		1.93755	-1.35293	-3.13068
#4	7.21802	8.01155	6.60665	8.15412	8.08427	5.36772	5.78449	6.81601	5.17097	4.95597	0.446781	4.49767
#5	8.85908	8.64349	9.2591	9.27628	10.1864	10.0078	10.3307	10.201	6.84901	7.74509	8.20746	8.3205
#6	5.902	4.848	5.248	5.185	5.322	5.761	3.287	4.854	3.164	-1.381	1.671	-4.105
#7	9.787	9.166	7.938		10.415	11.941	11.84	11.374	5.988	5.189	5.583	5.109
#8	8.46551	9.302	9.51107	9.11374	9.15362	9.35643	8.47523	8.73373	3.50683	3.85929	3.92539	4.47669
#9	7.48843	6.96809	7.36265	7.52663	6.30856	6.86726	7.26582	7.15659	2.75728	2.55533	2.86604	3.36062

## Sheet: ACE2_Data
	Delta CT
Donor ID	Control				High-chemokine				High-Interferons
#9	-11.113	-7.518	-7.345		-6.86	-7.438	-7.157		-4.92	-3.122	-3.367
#4	-4.012	-5.185	-4.719	-3.144	-4.708	-4.539	-3.679	-3.085	-2.935	-1.818	-1.84	-1.533
#8	-4.571	-4.653	-4.351	-4.774	-4.429	-5.053	-4.502	-4.723	-2.125	-2.112	-2.122	-2.086

## Sheet: TMPRSS2_Data
	Delta CT
Donor ID	Control				High-chemokine				High-Interferons
#9	-1.879	-1.887	-2.067		-1.796	-1.896	-1.422		-1.518	-1.379	-0.833
#4	-2.551	-2.355	-3.916	-2.334	-3.832	-3.542	-3.009	-2.886	0.425	-2.478	-3.375	-2.3
#8	-2.012	-1.985	-1.823	-1.963	-2.151	-1.938	-1.849	-1.826	-2.17	-2.138	-2.388	-2.107
